# Supplementary material for: Practical guidance for planning resources required to support publicly-funded adaptive clinical trials
Source: BMC Med. 2022 Aug 10;20:254. doi: 10.1186/s12916-022-02445-7 (PMC9364623; doi:10.1186/s12916-022-02445-7)
Supplement: Supplementary file 2 — Additional file 2. Costing spreadsheet. [file 12916_2022_2445_MOESM2_ESM.xlsx]

## Sheet: Trial resource tool
Title:
TIMELINE OVERVIEW	Guidance
Award duration: XX months	Funder: XX
	Start Date		Pre-Award	Year 1												Year 2												Year 3
	End Date			1	2	3	4	5	6	7	8	9	10	11	12	13	14	15	16	17	18	19	20	21	22	23	24	25	26	27	28	29	30	31	32	33	34	35	36
Trial Gantt chart
Protocol development
database build
Approvals
Set up	Number of sites/duration XX sites (Primary/social/secondary care?)
Recruitment	Target XX
intervention/setting	X arms
Follow up	timepoints/outcomes
interim analysis	month planned
Pilot	X
Close down data lock
Analysis/Write up
Drug procurement	add details
				Time (days)												Time (days)												Time (days)
				XX			XX			XX			XX			XX			XX			XX			XX			XX			XX			XX			XX
ACTIVITY	Description	Main CTU staff involved/leading activity	Pre-Award	Year 1												Year 2												Year 3
Input to trial design and grant application preparation/submission including statistical validation		Stats, Methodologists, TMs
Randomisation/database		Stats, DMs, TMs
Terms of business		TMs
collaborations agreements		TMs
Site agreements/ financial appendix & SD agreement		STM, TMs
Technical Agreements		TMs
Contracts - IMP supplier		TMs
Other Vendor contracts SLAs/assessments		TMs
MTA's		TMs
Questionaire agreements		TMs
Online ePRO Provider Contract		TMs
Total				0			0			0			0			0			0			0			0			0			0			0			0
Protocol Development/Approvals
Initial feasibility		TMs, CTAs
PI meetings		All
Statistical simulations for protocol		Stats
Protocol Completed		All (led by STMs, TMs)
finalise costs for REC submission		STMs, TMs
Associated Documents for submission	consent/PIS/letters/outcomes/IRAS/translation /capacity/	TMs
Sponsorship approval	monitor plan/delegation of duties/	TMs
REC/HRA submission/approvals	covering letter/ finalise docs/book/attend/respond to comments/amend docs/portfolio	TMs
MHRA submission/approvals/additional docs	IRAS/covering letter/impd/label/diaries/IMP managment guide/IB/pharmacy/manufacturer	TMs
Risk Assessment	develop/meeting/review/sign off	All
Insurance		TMs
Portfolio Adoption	PAF	CTA
PPI	review of consent/PIS etc	STMs, TMs
IP		STMs, TMs
Any trial specific training for CTU staff	consider each staff group i.e. stats, trial managers	All
TOTAL				0			0			0			0			0			0			0			0			0			0			0			0
Database development
Agree randomisation requirements		Stats, DMs
DB Agree Specification &CRF development		DMs, TMs, Stats, STMs
Database build		DMs, TMs, Stats, STMs
DB User Acceptance Testing		All
DMP and DVP		DMs, Stats, STM, TMs
Randomisation testing		Stats, DMs
TOTAL				0			0			0			0			0			0			0			0			0			0			0			0
Study set up/ Project management				Year 1
Trial Timelines	Gantt, Project Management plan, reporting schedule	STMs
Funder requirments pre trial	protocol approval, Budget changes, funder milestones, TOC member approvals	STMs
Site Feasibility	XX sites - create form, send to sites, chase, collate feedback, TMG	TMs, CTA
Study Launch	Launch/Investigator meeting	All
Vendor Management	Vendor assessments/contracts/schedules	TMs
Financial Management set up	budget/invoices/finance log update continually set up	STMs
Trial registration	ISCTRN/clinicaltrials.gov	CTA, TMs
Eudract		TMs
ePRO Provision Set-up		DMs, Stats, TMs
eConsent		DMs, TMs
Biobanking		TMs, CTA
Central support facilities		STMs, TMs
IT infrastructure/data transfer		STMs, DMs, TMs,
Sample transfers		CTA
purchase consumables		CTA
IMP supply chain		TMs, STM
Protocol Publication		All
TOTAL Days
Site Set up	XX sites over XX Months	TMs, CTA
ISF	Setup, printing, distribution	CTA
TMF set up		CTA
SIV	preparation and attendance	All
Confirmation of C&C/greenlight/approvals		TMs, CTA, DM
Site Documentation	Delegaton log, Training log, eligibility/consent proforma, Accountability, blinding, screening,version control	TM, CTA
Monitoring set up	Central Monitoring logs, template documents, pharmacy, labs	TM
Pharmacy set up	Pharmacy Manual, SmPC, IB, IMPD, Prescriptions, Accountability, Label, IMP manufacture, Placebo manufacture - see under randomisation system set up for DM time	TM
Other department set up - e.g. radiology		TM
Laboratories - e.g. NHS/university	Lab Manual & associated documents, equipment - for data side see below	TM
TOTAL				0			0			0			0
Recruitment Period				Year 1
Weekly contact/advice with sites	Depends on number of sites	TMs, CTA, DMs
regular newletter updates		TMs, CTA
Data Management	data cleaning, management of data queries	DM
Webinars/training/updates		All
Site Management	query resolution - depends on number of sites, and complexity of trial, scale of data, experience of sites	TMs, CTA
Trial Amendments	preparation, submission, communication to sites	STM, TMs, CTA
Manage deviations/violations/serious breaches	documentation and CAPAs	All (led by TM)
Central Monitoring	Central, preparation, reporting, resolution, monitoring plan updates	TMs, DMs, CTA
Onsite / remote monitoring	preparation, reporting, resolution, monitoring plan updates	TMs
Manage/review recruitment retention	upload of accruals	CTAs
Financial management	consumables, site payments,salaries, vendors, collaborators	STMs, TMs, CTAs
Safety reporting- continuous	SAE management, SAE reconciliation	TMs, CTA, STM
DSUR annually		TMs, CTA, STM
REC safety report		STM, TMs, CTA
MHRA reporting (including non-CE marked devices)		STM, TMs, CTA
Funder Reporting	drafting/review/submit ? Quarterly / annual depending on funder	STM, TMs, DMs, CTA
REC APR	prepare and submit	STMs, TMs
SUSARs, USMs	reporting	STM, TMs, CTA
Risk Assessment	annual review and update	All
Consumables/equipment servicing/callibration		CTAs
IMP management		DMs
shipping of samples		CTAs
Intervention specific requirements		STMs, TMs, DMs
Follow up data requirements		DMs
TMF maintenance		CTAs
Development of Statistical Analysis Plan		All (led by Stats)
TOTAL - days
Trial oversight meetings and interim analyses				Year 1
Internal trial management	Regular meetings	All
Monthly TMG	data download/reports	DMs
	Attendance	All
	Terms of Reference	TMs
	Agenda/planning/minutes	TMs, CTAs
DMC 2x year	data download/reports	DMs, Stats
	Terms of Reference/Charter/Template reports/Funder approval	TMs
	Attendance	All
	Agenda/planning/minutes	TMs, CTAs
TSC (or TOC) 2x year	data download/reports	DMs, Stats
	Terms of Reference/Charter/Template reports/Funder approval	TMs, CTAs
	Attendance	All
	Agenda/planning/minutes	TMs, CTAs
Clinical Events Committee	Preparation/agenda/report, depends on complexity of data to be adjudicated if applicable	TMs, DMs, Stats
Interim analysis		Stats
Implementation of interim analysis findings	Change in randomisation/database/protocol amendments	All
TOTAL				0			0			0			0
Close down				Year 1
End of Study notifications	REC, MHRA etc	STMs, TMs
Trial Registration	ISRCTN/clinicaltrials.gov	TMs
Eudract		TMs, stats
SAE reconciliation		TMs
Data Management	final data cleaning and queries, data lock, screening data - depends on complexity of data and number of centres	DMs
Data Lock		DMs
Conduct final statistical analysis according to SAP	Validation & writing End of Trial Statistical Report	Stats
Management of recruitment closure	closedown visits and completion of final monitoring actions	TMs, CTAs
Safety management	Final reconciliation	TMs
Funder Reporting		All (led by STM)
Site Closure	ISF review, Monitoring, Pharmacy, Laboratories, calls, reports, notifications, site archiving	TMs, CTAs
Study equipment management		CTAs
End of study reporting	REC, MHRA, EudraCT, patient/participant facing	All (led by STM)
Dissemination	Results publication, PPI&E, dissemination of results, conferences	All (led by STM)
Anonymisation of dataset/data sharing		DMs
Archiving (including of data)	TMF, data to sites	DMs, CTAs
Financial reconciliation		STMs
TOTAL
TOTAL RESOURCE REQUIREMENT (days/hours)
TOTAL FTE	220 x days in a typical working year
